# Supplementary material for: Solvent-Free Coupling Reaction of Carbon Dioxide and Epoxides Catalyzed by Quaternary Ammonium Functionalized Schiff Base Metal Complexes under Mild Conditions
Source: MDPI journal article supplement (doi:10.3390/ma16041646), 2023-02-16
Supplement: s1 [file s1]

**Table S1.** Provenance and mass fraction purity of the materials.

| Materials                       | Mass fraction | CAS        | Provenance                                    |
|---------------------------------|---------------|------------|-----------------------------------------------|
| Propylene oxide                 | 0.99          | 16088-62-3 | Shanghai Darui Finechemical Co., Ltd.         |
| 1,2-Epoxyethylbenzene           | 0.99          | 96-09-3    | Shanghai Darui Finechemical Co., Ltd.         |
| Epichlorohydrin                 | 0.99          | 106-89-8   | Shanghai Darui Finechemical Co., Ltd.         |
| Carbon dioxide                  | 0.9999        | 124-38-9   | Sichuan Tianyi Science & Technology Co., Ltd. |
| Zinc acetate dihydrate          | 0.99          | 5970-45-6  | Sinopharm Chemical Reagent Co., Ltd.          |
| Copper(II) acetate monohydrate  | 0.98          | 6046-93-1  | Sinopharm Chemical Reagent Co., Ltd.          |
| Lead(II) acetate trihydrate     | 0.995         | 6080-56-4  | Tianjin TEDA letai Chemical Co., Ltd.         |
| Cobalt(II) chloride hexahydrate | 0.99          | 7791-13-1  | Tianjin Tianda Chemical Co., Ltd.             |
| Nickel(II) chloride hexahydrate | 0.98          | 7791-20-0  | Shanghai Shanpu Chemical Co., Ltd.            |

## 1. Characterization data for ligands

**Table S2.** Structure of ligands.

| Ligand/ Catalyst | Structure                                                                             |
|------------------|---------------------------------------------------------------------------------------|
| <b>NPCI</b>      | 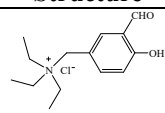 |
| <b>NPBr</b>      |  |
| <b>NPI</b>       |  |

**NPCI:** 75% yield.  $^1\text{H}$  NMR (400 MHz, DMSO)  $\delta$  11.51 (s, 1H), 10.32 (s, 1H), 7.77 (s, 1H), 7.61 (d,  $J$  = 8.4 Hz, 1H), 7.25 (d,  $J$  = 9.0 Hz, 1H), 4.46 (s, 2H), 3.11 (t,  $J$  = 20.2 Hz, 6H), 1.27 (dd,  $J$  = 20.3, 13.6 Hz, 9H).  $^{13}\text{C}$  NMR (101 MHz, DMSO)  $\delta$  190.47, 162.69, 140.26, 132.42, 127.53, 122.33, 118.57, 51.79, 45.17, 7.95. Selected IR peaks (KBr,  $\text{cm}^{-1}$ ):  $\nu$ 2911, 1691, 1601, 1441, 795. Anal. Calcd for  $\text{C}_{14}\text{H}_{22}\text{ClNO}_2$ : C, 61.87; H, 8.16; N, 5.15%. Found: C, 61.88; H, 8.14; N, 5.12%.

**NPBr:** 50% yield.  $^1\text{H}$  NMR (400 MHz, DMSO)  $\delta$  11.19 (s, 1H), 10.29 (s,  $J$  = 7.3 Hz, 1H), 7.79 (s,  $J$  = 16.7, 8.8 Hz, 1H), 7.61 (d,  $J$  = 8.6 Hz, 1H), 7.11 (d,  $J$  = 11.0 Hz, 1H), 4.45 (s, 2H), 3.12 (t,  $J$  = 14.1 Hz, 6H), 1.28 (dd, 9H).  $^{13}\text{C}$  NMR (101 MHz, DMSO)  $\delta$  190.54, 163.51, 140.40, 133.44, 123.17, 119.25, 118.53, 52.34, 46.90, 7.97. Selected IR peaks (KBr,  $\text{cm}^{-1}$ ):  $\nu$ 2909, 1671, 1599, 1432, 793. Anal. Calcd for  $\text{C}_{14}\text{H}_{22}\text{BrNO}_2$ : C, 53.17; H, 7.01; N, 4.43%. Found: C, 53.15; H, 7.05; N, 4.42%.

**NPI:** 43% yield.  $^1\text{H}$  NMR (400 MHz, DMSO)  $\delta$  10.39 (s, 1H), 10.11 (s, 1H), 7.77 (s,  $J$  = 5.5 Hz, 1H), 7.59 (d,  $J$  = 16.7 Hz, 1H), 7.17 (d, 1H), 4.46 (s,  $J$  = 8.6 Hz, 2H), 3.09 (t,  $J$  = 13.5 Hz, 6H), 1.27 (dd,  $J$  = 15.9 Hz, 9H).  $^{13}\text{C}$  NMR (101 MHz, DMSO)  $\delta$  190.52, 162.66, 139.66, 136.19, 132.99, 122.93, 118.05, 51.80, 45.69, 7.75. Selected IR peaks (KBr,  $\text{cm}^{-1}$ ):  $\nu$ 2901, 1662, 1590, 1428, 782. Anal. Calcd for  $\text{C}_{14}\text{H}_{22}\text{INO}_2$ : C, 46.29; H, 6.10; N, 3.86%. Found: C, 46.28; H, 6.11; N, 3.88%.

## 2. Syntheses of metal complexes Zn-NPClR, Zn-NPXH, M-NPClH

Table S3. Structure of catalysts.

| Catalyst    | Structure |
|-------------|-----------|
| Zn-NPClH    |           |
| Zn-NPClCl   |           |
| Zn-NPClNO2  |           |
| Zn-NPClCH3  |           |
| Zn-NPClC4H9 |           |
| Zn-NPBrH    |           |
| Zn-NPIH     |           |
| Co-NPClH    |           |
| Pb-NPClH    |           |
| Ni-NPClH    |           |

**Cu-NPClH**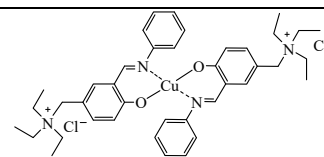

**Zn-NPClH:** 91% yield. Mp. 204–205 °C;  $^1\text{H}$  NMR (400 MHz, DMSO)  $\delta$  8.60 (s, 2H), 7.64 (d,  $J$  = 7.8 Hz, 4H), 7.48 (dd,  $J$  = 15.8, 7.9 Hz, 6H), 7.34 (d,  $J$  = 8.1 Hz, 4H), 6.70 (d,  $J$  = 9.2 Hz, 2H), 4.30 (s, 4H), 3.18–3.09 (m, 12H), 1.30 (t,  $J$  = 6.9 Hz, 18H);  $^{13}\text{C}$  NMR (101 MHz, DMSO)  $\delta$  172.04, 168.89, 149.48, 142.43, 138.77, 129.74, 127.27, 123.77, 122.50, 119.32, 112.16, 59.70, 51.71, 49.08, 46.18, 40.57, 40.36, 40.15, 39.94, 39.73, 39.53, 39.32, 10.19, 7.94; Selected IR peaks (KBr,  $\text{cm}^{-1}$ ):  $\nu$  3047, 1616, 1534, 1472, 1438, 691, 521; Anal. Calcd for  $\text{C}_{40}\text{H}_{50}\text{Cl}_2\text{N}_6\text{O}_6\text{Zn}$ : C, 63.45; H, 6.92; N, 7.40%. Found: C, 63.36; H, 6.96; N, 7.48%.

**Zn-NPClCl:** 78% yield. Mp. 178–200 °C;  $^1\text{H}$  NMR (400 MHz, DMSO)  $\delta$  8.59 (s, 2H), 7.67 (d,  $J$  = 8.0 Hz, 4H), 7.56–7.49 (m, 6H), 7.34 (d, 2H), 6.69 (d, 2H), 4.30 (s, 4H), 3.13 (d,  $J$  = 7.0 Hz, 12H), 1.30 (t,  $J$  = 6.7 Hz, 18H);  $^{13}\text{C}$  NMR (101 MHz, DMSO)  $\delta$  172.23, 169.18, 148.35, 142.50, 138.93, 131.60, 129.65, 124.28, 123.86, 119.24, 112.26, 59.86, 51.80, 7.95; Selected IR peaks (KBr,  $\text{cm}^{-1}$ ):  $\nu$  3069, 1617, 1582, 1532, 1468, 694, 526; Anal. Calcd for  $\text{C}_{40}\text{H}_{50}\text{Cl}_4\text{N}_4\text{O}_2\text{Zn}$ : C, 58.16; H, 6.10; N, 6.78%. Found: C, 58.04; H, 6.31; N, 6.72%.

**Zn-NPClNO<sub>2</sub>:** 90% yield. Mp. 208–209 °C;  $^1\text{H}$  NMR (400 MHz, DMSO)  $\delta$  8.69 (s, 2H), 8.36 (d, 4H), 7.90–7.79 (m, 4H), 7.55 (s, 2H), 7.39 (d, 2H), 6.73 (d, 2H), 4.32 (s, 4H), 3.14 (d,  $J$  = 7.2 Hz, 12H), 1.30 (t,  $J$  = 7.2 Hz, 18H);  $^{13}\text{C}$  NMR (101 MHz, DMSO)  $\delta$  171.74, 169.62, 144.91, 141.82, 138.56, 125.56, 125.27, 124.31, 123.05, 122.63, 118.09, 111.54, 110.91, 58.58, 50.71, 6.87;

Selected IR peaks (KBr,  $\text{cm}^{-1}$ ):  $\nu$  3008, 1621, 1511, 1533, 1470, 694, 521; Anal. Calcd for  $\text{C}_{40}\text{H}_{50}\text{Cl}_2\text{N}_6\text{O}_6\text{Zn}$ : C, 56.71; H, 5.95; N, 9.92%. Found: C, 56.58; H, 5.98; N, 9.81%.

**Zn-NPClCH<sub>3</sub>:** 87% yield. Mp. 200–201 °C;  $^1\text{H}$  NMR (400 MHz, DMSO)  $\delta$  8.59 (s, 2H), 7.67 (d,  $J$  = 8.0 Hz, 4H), 7.56–7.49 (m, 6H), 7.34 (d, 2H), 6.69 (d, 2H), 4.30 (s, 4H), 3.13 (d,  $J$  = 7.0 Hz, 12H), 1.30 (t,  $J$  = 6.7 Hz, 18H);  $^{13}\text{C}$  NMR (101 MHz, DMSO)  $\delta$  173.09, 166.52, 145.31, 142.55, 136.43, 126.34, 124.25, 124.00, 122.53, 121.89, 117.29, 110.66, 109.32, 57.50, 56.56, 49.41, 6.87;

Selected IR peaks (KBr,  $\text{cm}^{-1}$ ):  $\nu$  3069, 1617, 1582, 1532, 1468, 694, 526; Anal. Calcd for  $\text{C}_{42}\text{H}_{56}\text{Cl}_2\text{N}_4\text{O}_2\text{Zn}$ : C, 64.24; H, 7.19; N, 7.14%. Found: C, 64.14; H, 7.26; N, 7.09%.

**Zn-NPClC<sub>4</sub>H<sub>9</sub>:** 82% yield. Mp. 207–208 °C;  $^1\text{H}$  NMR (400 MHz, DMSO)  $\delta$  8.56 (s, 2H), 7.62–7.42 (m, 6H), 7.39–7.14 (m, 6H), 6.68 (d, 2H), 4.29 (s, 4H), 3.12 (d, 12H), 2.33 (s, 6H), 1.30 (t, 18H);

$^{13}\text{C}$  NMR (101 MHz, DMSO)  $\delta$  171.69, 169.04, 161.64, 155.55, 142.28, 137.07, 129.52, 122.56, 122.28, 118.42, 116.69, 102.68, 99.36, 53.37, 51.70, 49.06, 32.31, 31.16, 26.09, 20.94, 14.23, 7.92; Selected IR peaks (KBr,  $\text{cm}^{-1}$ ):  $\nu$  3003, 1617, 1533, 1509, 1471, 658, 499; Anal. Calcd for  $\text{C}_{48}\text{H}_{68}\text{Cl}_2\text{N}_4\text{O}_2\text{Zn}$ : C, 66.31; H, 7.88; N, 6.44%. Found: C, 66.26; H, 7.96; N, 6.29%.

**Zn-NPBrH:** 89% yield. Mp. 200–203 °C;  $^1\text{H}$  NMR (400 MHz, DMSO)  $\delta$  8.59 (s, 1H), 7.65 (d,  $J$  = 7.7 Hz, 2H), 7.52 (s, 1H), 7.33 (d, 3H), 7.08 (d,  $J$  = 8.3 Hz, 1H), 6.70 (d,  $J$  = 8.8 Hz, 1H), 4.29 (s, 2H), 3.17–3.08 (m, 6H), 1.28 (t,  $J$  = 7.1 Hz, 9H);  $^{13}\text{C}$  NMR (101 MHz, DMSO)  $\delta$  169.01, 159.90, 148.88, 142.48, 129.90, 127.29, 123.77, 122.61, 121.84, 117.25, 113.32, 113.20, 112.42, 51.79, 46.07, 7.95; Selected IR peaks (KBr,  $\text{cm}^{-1}$ ): 2984, 1614, 1530, 1499, 1468, 655, 496; Anal. Calcd for  $\text{C}_{48}\text{H}_{68}\text{Br}_2\text{N}_4\text{O}_2\text{Zn}$ : C, 56.78; H, 6.19; N, 6.62%. Found: C, 56.70; H, 6.23; N, 6.55%.

**Zn-NPIH:** 86% yield. Mp. 198–200 °C;  $^1\text{H}$  NMR (400 MHz, DMSO)  $\delta$  8.64 (d,  $J$  = 50.9 Hz, 1H), 7.56 (d,  $J$  = 18.0 Hz, 1H), 7.47 (s, 1H), 7.35 (s, 3H), 7.29–7.18 (m, 2H), 6.75 (s, 1H), 4.31 (s, 2H), 2.97 (d,  $J$  = 131.6 Hz, 6H), 1.38 (t, 9H);  $^{13}\text{C}$  NMR (101 MHz, DMSO)  $\delta$  163.21, 154.45, 142.76, 142.48, 120.89, 119.98, 117.32, 116.81, 115.04, 110.99, 109.32, 109.20, 107.34, 51.81, 46.47, 7.93.

Selected IR peaks (KBr,  $\text{cm}^{-1}$ ): 2978, 16014, 1523, 1496, 1459, 653, 488; Anal. Calcd for  $\text{C}_{48}\text{H}_{68}\text{Br}_2\text{N}_4\text{O}_2\text{Zn}$ : C, 51.11; H, 5.58; N, 5.96%. Found: C, 51.12; H, 5.63; N, 5.80%.

**Co-NPClH:** 88% yield. Mp. 233–234 °C; Selected IR peaks (KBr,  $\text{cm}^{-1}$ ):  $\nu$  3024, 1632, 1532, 1477, 1454, 684, 505; Anal. Calcd for  $\text{C}_{40}\text{H}_{50}\text{Cl}_2\text{N}_6\text{O}_6\text{Co}$ : C, 57.15; H, 5.99; N, 10.00%. Found: C, 57.02; H, 6.10; N, 9.89%.

**Pb-NPClH:** 43% yield. Mp. 210–212 °C; Selected IR peaks (KBr,  $\text{cm}^{-1}$ ):  $\nu$  3063, 1615, 1526, 1505, 1486, 690, 510; Anal. Calcd for  $\text{C}_{40}\text{H}_{50}\text{Cl}_2\text{N}_6\text{O}_6\text{Pb}$ : C, 48.58; H, 5.10; N, 8.50%. Found: C, 48.67; H, 5.21; N, 8.42%.

**Ni-NPClH:** 36% yield. Mp. 229–231 °C; Selected IR peaks (KBr,  $\text{cm}^{-1}$ ):  $\nu$  3006, 1615, 1506, 1485, 1455, 691, 511; Anal. Calcd for  $\text{C}_{40}\text{H}_{50}\text{Cl}_2\text{N}_6\text{O}_6\text{Ni}$ : C, 57.16; H, 6.00; N, 10.00%. Found: C, 57.11; H, 6.17; N, 9.88%.

**Cu-NPClH:** 89% yield. Mp. 206–208 °C; Selected IR peaks (KBr,  $\text{cm}^{-1}$ ):  $\nu$  3053, 1616, 1532, 1507, 1466, 681, 503; Anal. Calcd for  $\text{C}_{40}\text{H}_{50}\text{Cl}_2\text{N}_6\text{O}_6\text{Cu}$ : C, 56.83; H, 5.96; N, 9.94%. Found: C, 56.82; H, 5.99; N, 9.84%.

### 3. General procedure for the cycloaddition of $\text{CO}_2$ to epoxides at high pressure

A typical procedure for the coupling reaction of  $\text{CO}_2$  and epoxide was as following: A 250 mL stainless steel autoclave with catalyst and stir was dried in vacuum, then it was linked to  $\text{CO}_2$  cylinders and purged with  $\text{CO}_2$  for three times under atmosphere pressure. When the epoxide was added into the reactor with a hypodermic syringe, the autoclave was sealed and dipped into a pre-heated oil bath at the desired temperature under stirring. Then, carbon dioxide was introduced into the reactor to the set pressure to start the reaction. After the set time, the reaction vessel was cooled quickly with an ice water to release the pressure slowly. The yield and selectivity were obtained by  $^1\text{H}$  NMR analysis. For all the experiments with different catalysts, no byproduct was detected.

### 4. General procedure for the cycloaddition of $\text{CO}_2$ to epoxides at atmospheric pressure

A sealed Schlenk flask (75 mL) with catalyst and a magnetic stir linking with a  $\text{CO}_2$  balloon was purged with  $\text{CO}_2$  for three times. Under the protection of  $\text{CO}_2$ , epoxide was injected into the flask via syringe, and then the Schlenk flask was dipped into a pre-heated oil bath at a desired temperature and stir started. Then  $\text{CO}_2$  was introduced into the system and the reaction time was counted. After the reaction, the yield and selectivity were tested by  $^1\text{H}$  NMR.

### 5. Catalyst recycling

For each run, the catalyst was used directly for the next cycle after simple procedure: filtration, washing with acetone and drying in vacuum.

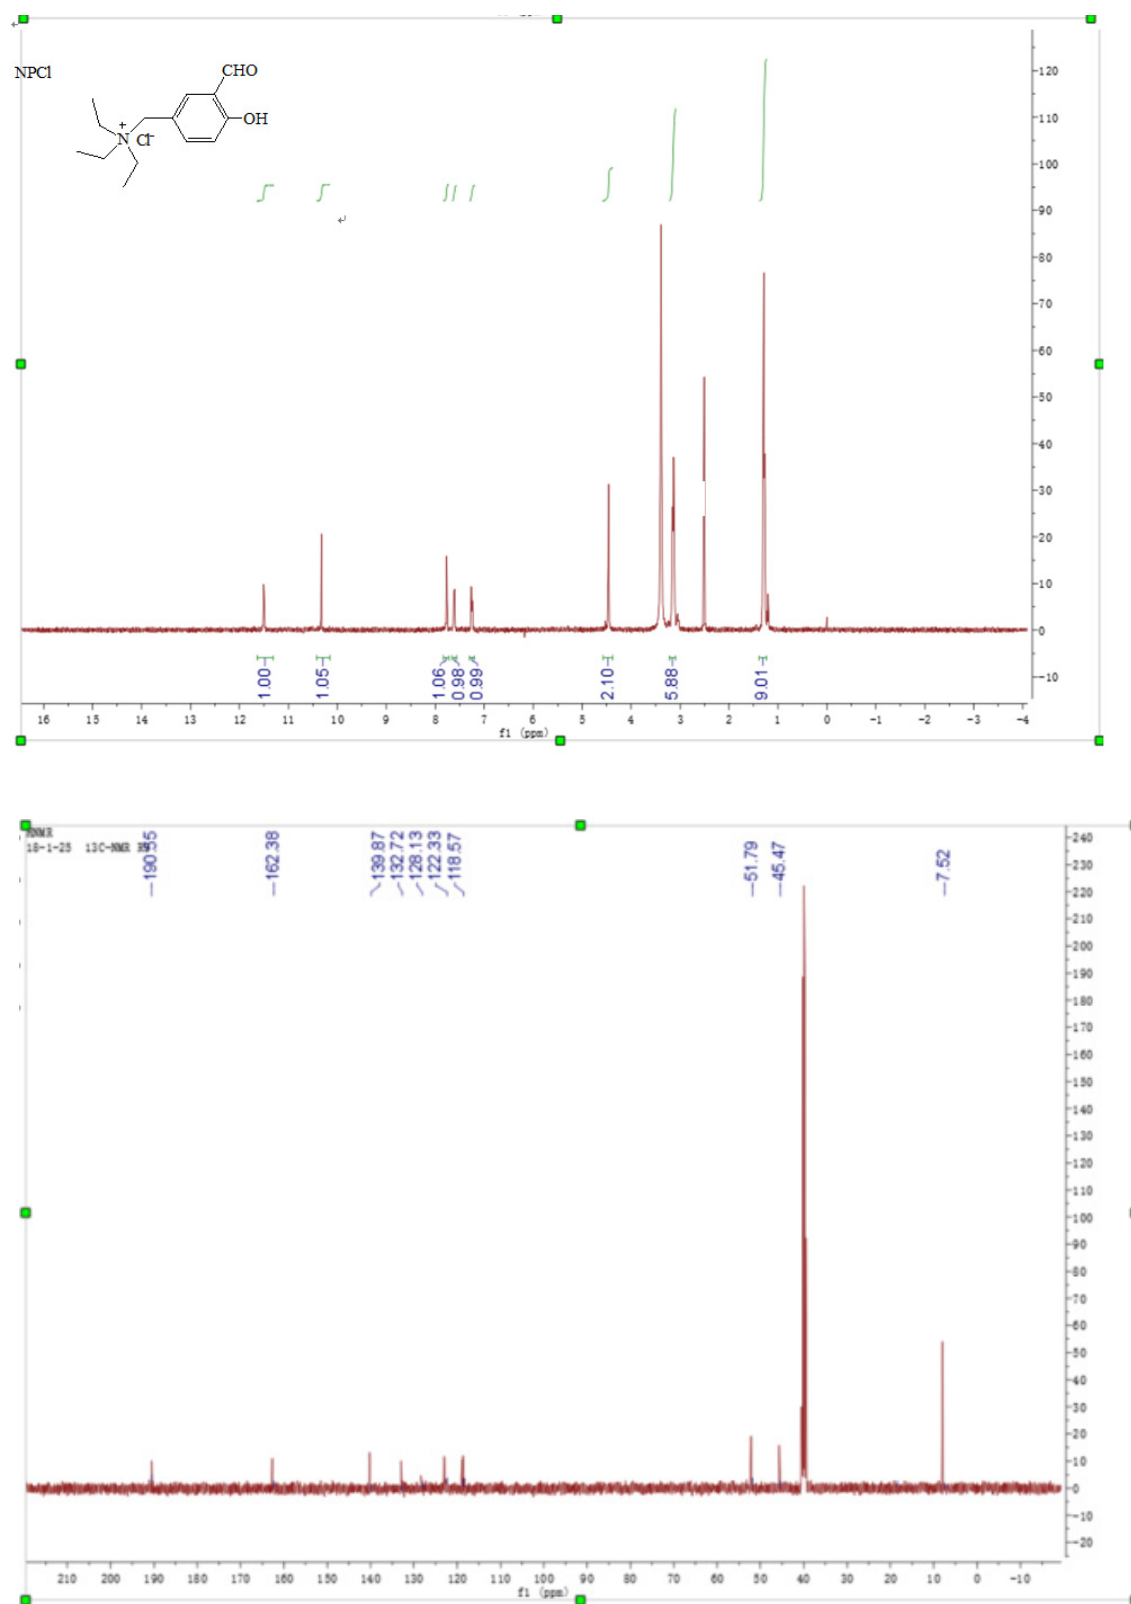

Figure S1. <sup>1</sup>H NMR and <sup>13</sup>C NMR spectra for NPCl in DMSO-d<sub>6</sub>.

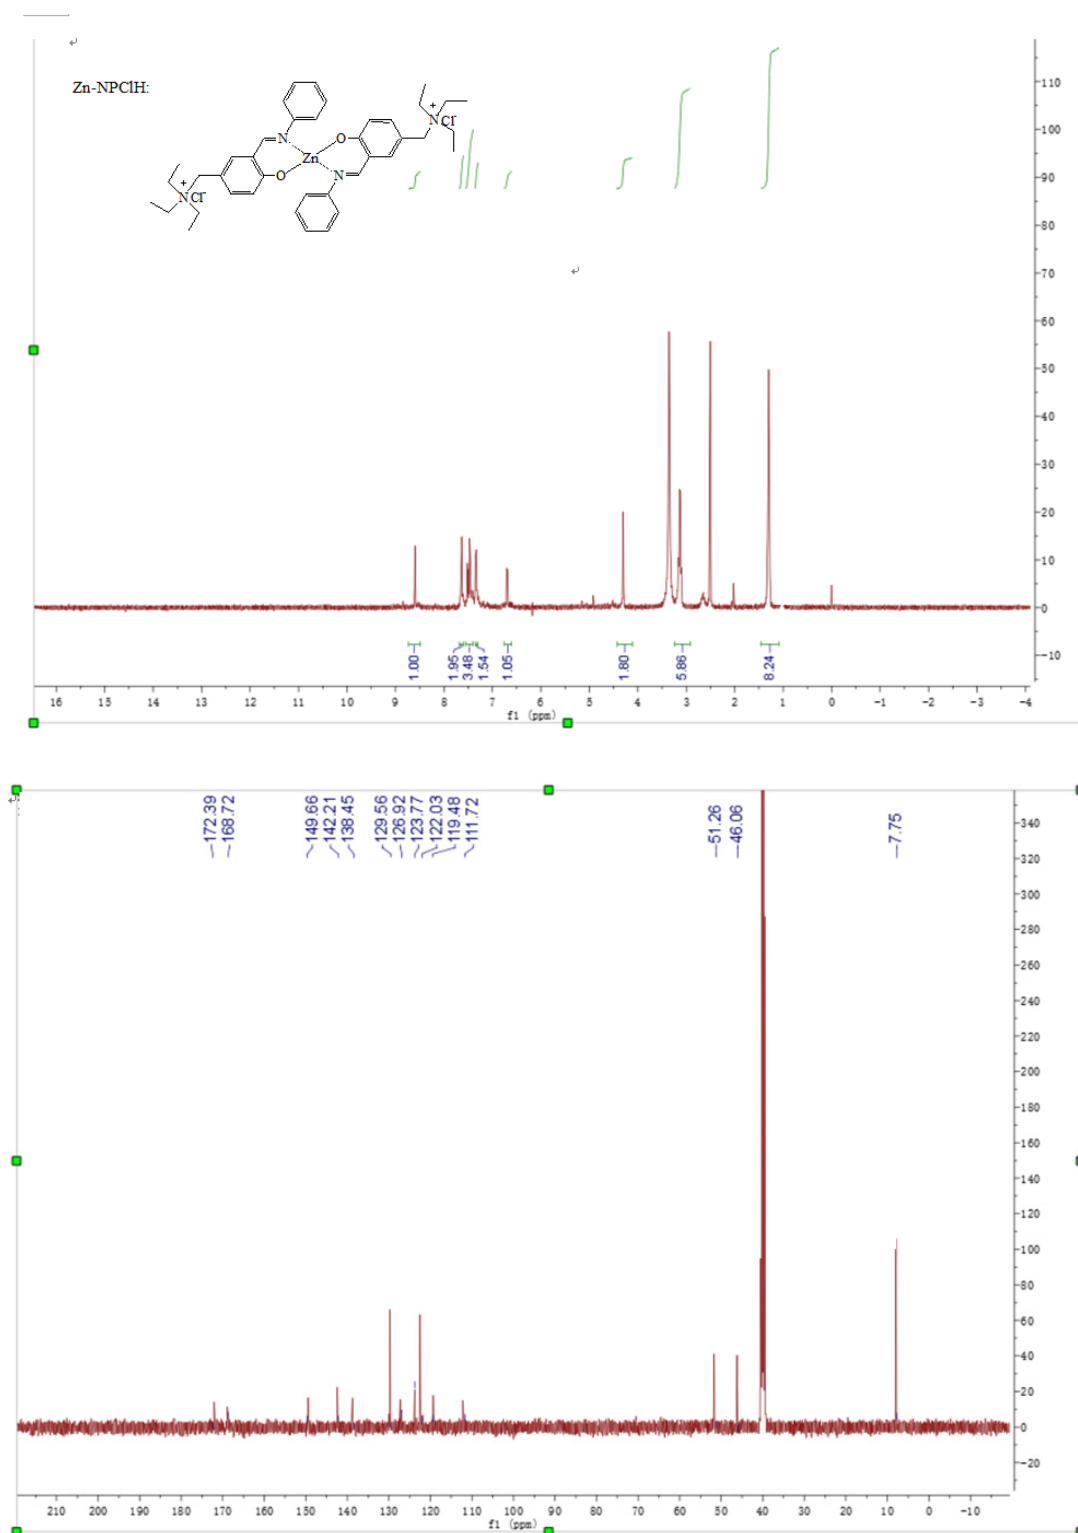

Figure S2.  $^1\text{H}$  NMR and  $^{13}\text{C}$  NMR spectra for Zn-NPClH in DMSO- $d_6$ .

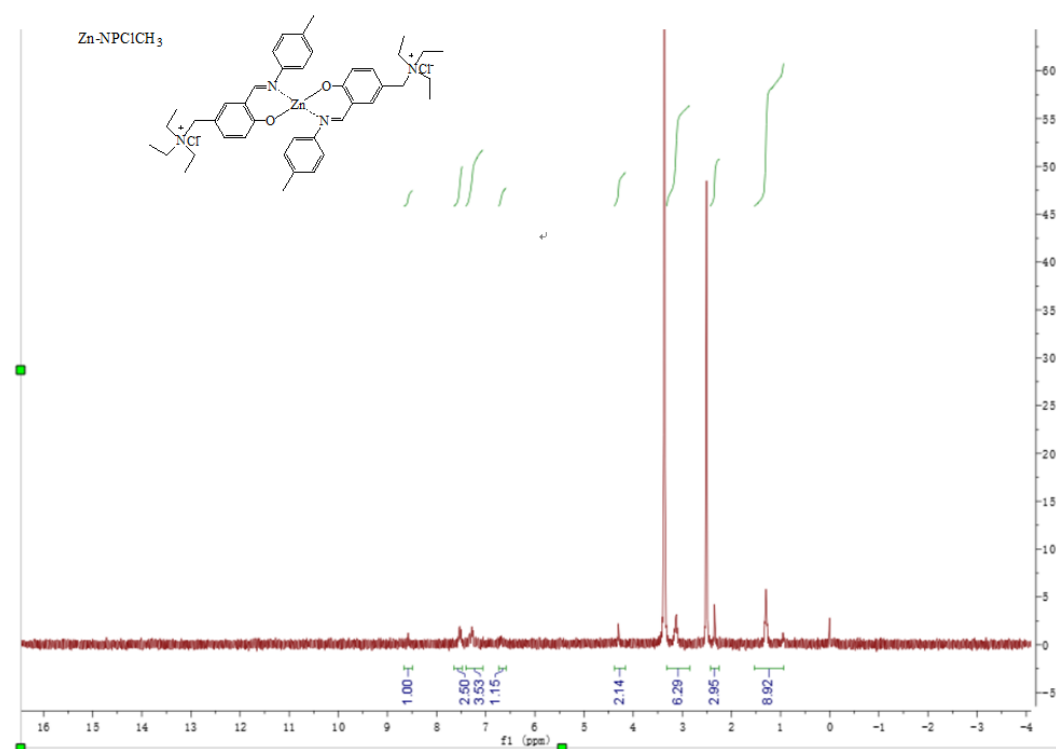

Figure S3.  $^1\text{H}$  NMR spectrum for  $\text{Zn-NPClCH}_3$  in  $\text{DMSO-d}_6$ .

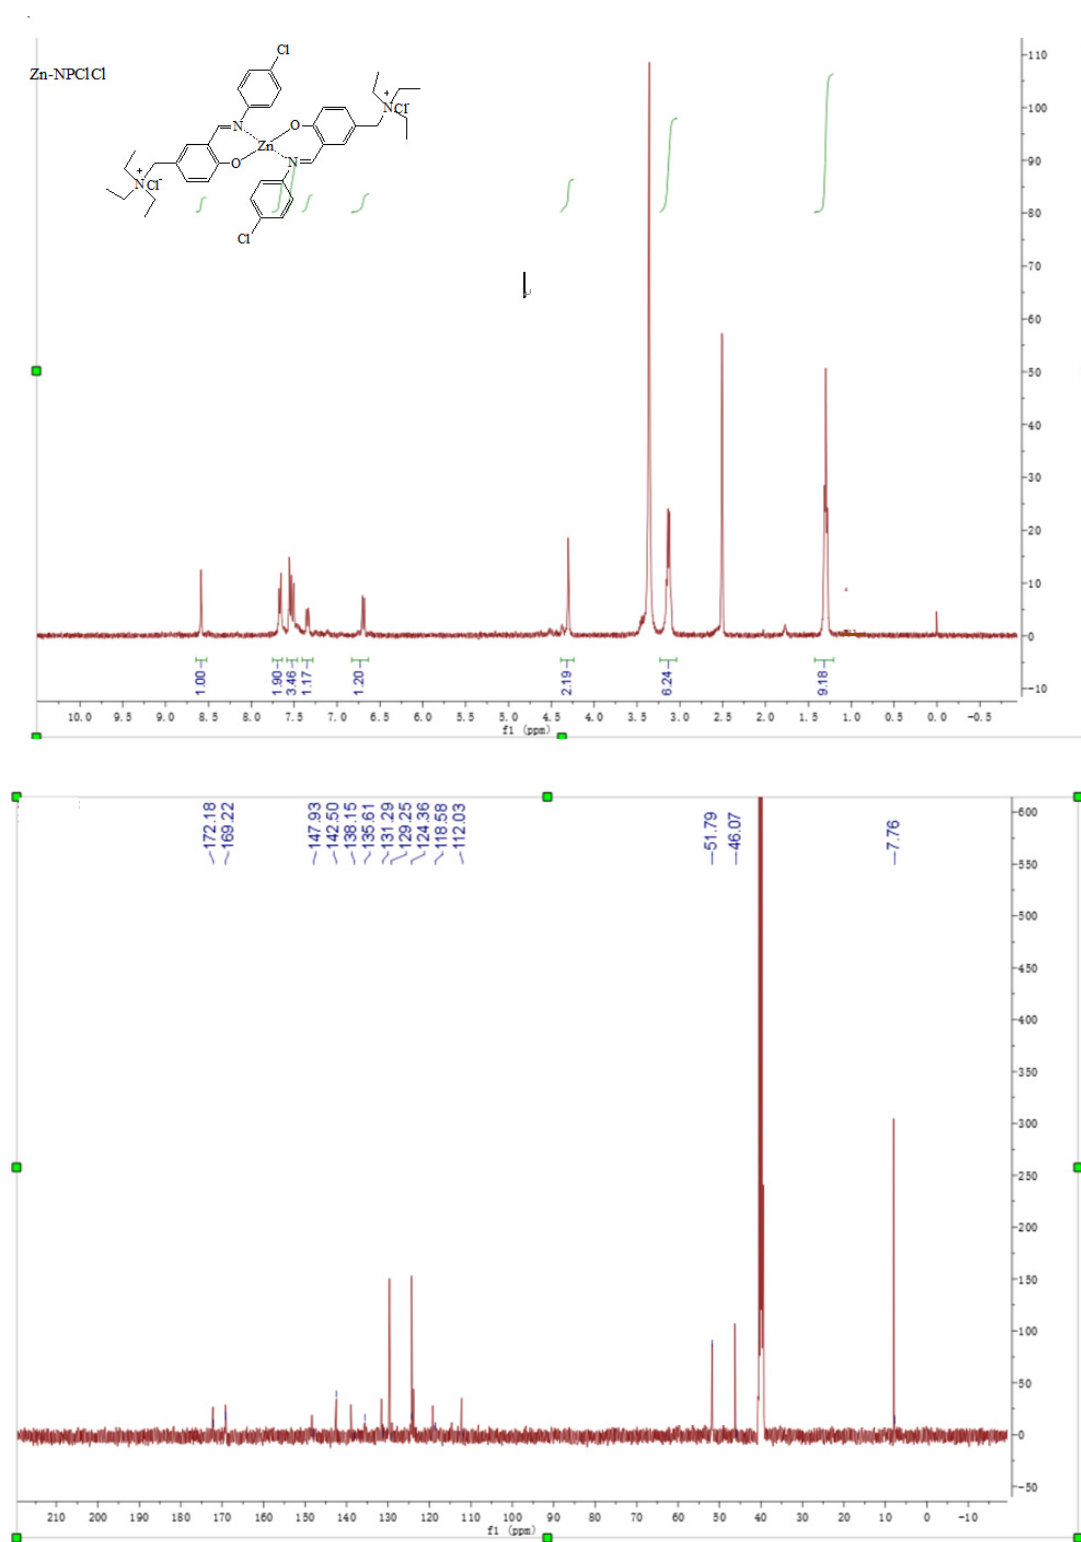

**Figure S4.** <sup>1</sup>H NMR and <sup>13</sup>C NMR spectra for **Zn-NPClCl** in DMSO-d<sub>6</sub>.



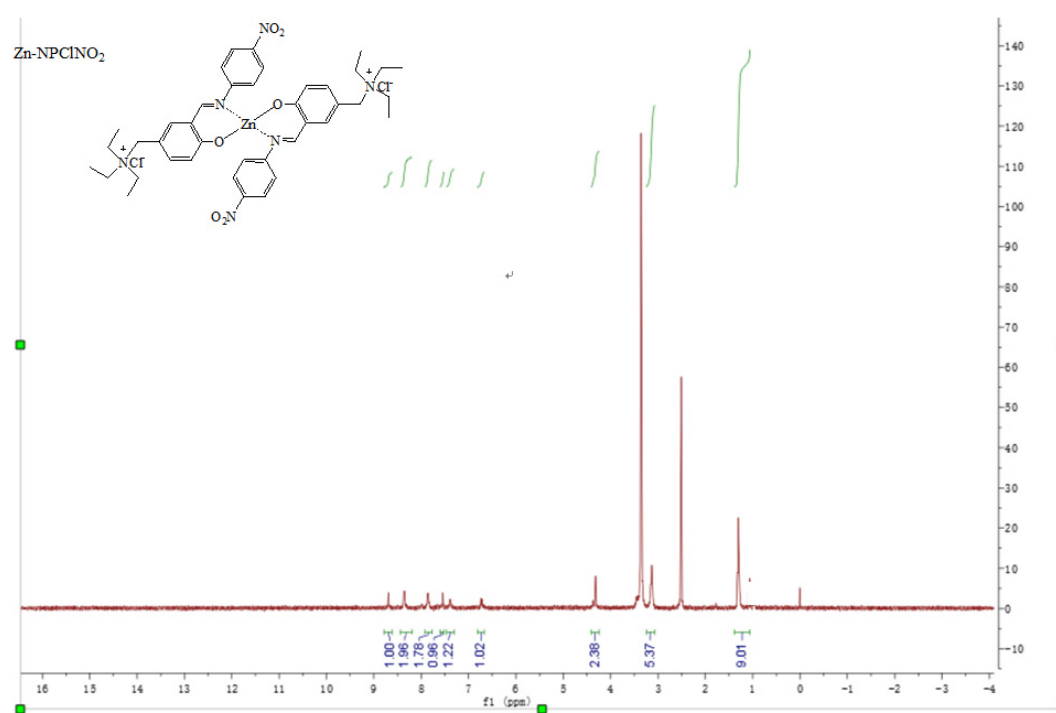

Figure S5.  $^1\text{H}$  NMR spectrum for  $\text{Zn-NPClNO}_2$  in  $\text{DMSO-d}_6$ .

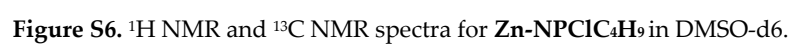

**Table S4.** Effects of the reaction time on cycloaddition of CO<sub>2</sub> and glycidyl isopropyl ether at atmospheric pressure by **Zn-NPCIH** at 363 K<sup>a</sup>.

| entry | time (h) | yield (%) <sup>b</sup> | selectivity (%) <sup>b</sup> |
|-------|----------|------------------------|------------------------------|
| 1     | 2        | 0.03                   | >99                          |
| 2     | 4        | 0.083                  | >99                          |
| 3     | 6        | 0.156                  | >99                          |
| 4     | 8        | 0.264                  | >99                          |
| 5     | 10       | 0.34                   | >99                          |

<sup>a</sup> Catalyst: Glycidyl isopropyl ether: 5 mL, **Zn-NPCIH**: 1 mol%; CO<sub>2</sub> pressure: 0.1 MPa; temperature: 90 °C.

<sup>b</sup> Yields and selectivities were determined by <sup>1</sup>H NMR spectrum of the reaction mixture.

**Table S5.** Effects of the reaction time on cycloaddition of CO<sub>2</sub> and glycidyl isopropyl ether at atmospheric pressure by **Zn-NPCIH** at 373 K<sup>a</sup>.

| entry | time (h) | yield (%) <sup>b</sup> | selectivity (%) <sup>b</sup> |
|-------|----------|------------------------|------------------------------|
| 1     | 2        | 0.043                  | >99                          |
| 2     | 4        | 0.106                  | >99                          |
| 3     | 6        | 0.239                  | >99                          |
| 4     | 8        | 0.335                  | >99                          |
| 5     | 10       | 0.45                   | >99                          |

<sup>a</sup> Catalyst: Glycidyl isopropyl ether: 5 mL, **Zn-NPCIH**: 1 mol%; CO<sub>2</sub> pressure: 0.1 MPa; temperature: 100 °C.

<sup>b</sup> Yields and selectivities were determined by <sup>1</sup>H NMR spectrum of the reaction mixture.

**Table S6.** Effects of the reaction time on cycloaddition of CO<sub>2</sub> and glycidyl isopropyl ether at atmospheric pressure by **Zn-NPCIH** at 383 K<sup>a</sup>.

| entry | time (h) | yield (%) <sup>b</sup> | selectivity (%) <sup>b</sup> |
|-------|----------|------------------------|------------------------------|
| 1     | 2        | 0.05                   | >99                          |
| 2     | 4        | 0.165                  | >99                          |
| 3     | 6        | 0.277                  | >99                          |
| 4     | 8        | 0.424                  | >99                          |
| 5     | 10       | 0.53                   | >99                          |

<sup>a</sup> Catalyst: Glycidyl isopropyl ether: 5 mL, **Zn-NPCIH**: 1 mol%; CO<sub>2</sub> pressure: 0.1 MPa; temperature: 110 °C.

<sup>b</sup> Yields and selectivities were determined by <sup>1</sup>H NMR spectrum of the reaction mixture.

**Table S7.** Effects of the reaction time on cycloaddition of CO<sub>2</sub> and glycidyl isopropyl ether at atmospheric pressure by **Zn-NPCIH** at 393 K<sup>a</sup>.

| entry | time (h) | yield (%) <sup>b</sup> | selectivity (%) <sup>b</sup> |
|-------|----------|------------------------|------------------------------|
| 1     | 2        | 0.056                  | >99                          |
| 2     | 4        | 0.212                  | >99                          |
| 3     | 6        | 0.372                  | >99                          |
| 4     | 8        | 0.507                  | >99                          |
| 5     | 10       | 0.597                  | >99                          |

<sup>a</sup> Catalyst: Glycidyl isopropyl ether: 5 mL, **Zn-NPCIH**: 1 mol%; CO<sub>2</sub> pressure: 0.1 MPa; temperature: 120 °C.

<sup>b</sup> Yields and selectivities were determined by <sup>1</sup>H NMR spectrum of the reaction mixture.

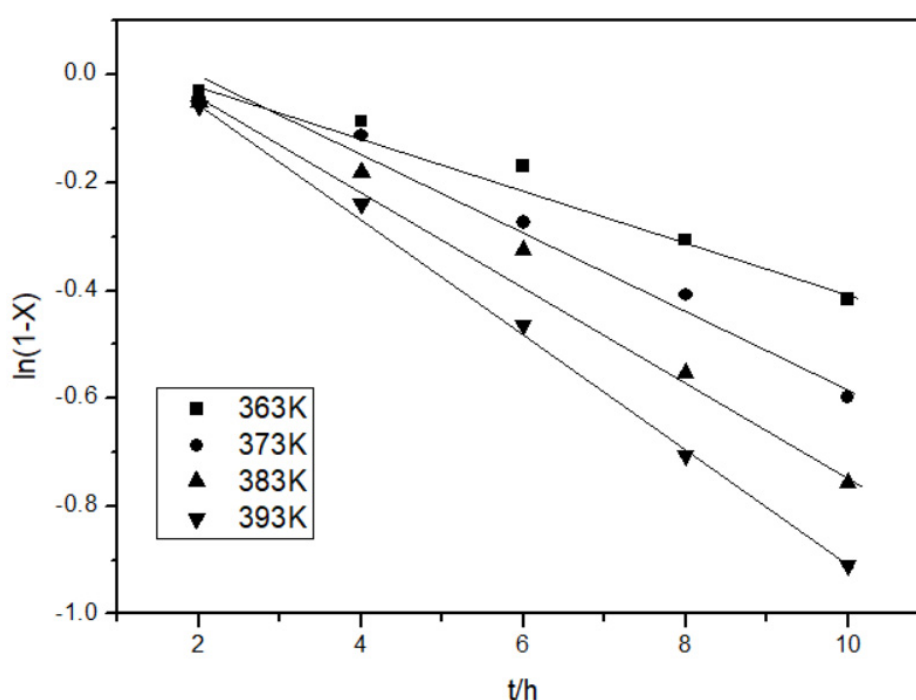**Figure S7.** Logarithmic plots of (1 – x) versus time by **Zn-NPCIH** at 363–393 K.**Table S8.** Effects of the reaction time on cycloaddition of CO<sub>2</sub> and glycidyl isopropyl ether at atmospheric pressure by **Co-NPCIH** at 363 K<sup>a</sup>.

| entry | time (h) | yield (%) <sup>b</sup> | selectivity (%) <sup>b</sup> |
|-------|----------|------------------------|------------------------------|
| 1     | 2        | 0.063                  | >99                          |
| 2     | 4        | 0.185                  | >99                          |
| 3     | 6        | 0.326                  | >99                          |
| 4     | 8        | 0.417                  | >99                          |
| 5     | 10       | 0.489                  | >99                          |

<sup>a</sup> Catalyst: Glycidyl isopropyl ether: 5 mL, **Co-NPCIH**: 1 mol%; CO<sub>2</sub> pressure: 0.1 MPa; temperature: 90 °C.

<sup>b</sup> Yields and selectivities were determined by <sup>1</sup>H NMR spectrum of the reaction mixture.

**Table S9.** Effects of the reaction time on cycloaddition of CO<sub>2</sub> and glycidyl isopropyl ether at atmospheric pressure by **Co-NPCIH** at 373 K<sup>a</sup>.

| entry | time (h) | yield (%) <sup>b</sup> | selectivity (%) <sup>b</sup> |
|-------|----------|------------------------|------------------------------|
| 1     | 2        | 0.082                  | >99                          |
| 2     | 4        | 0.233                  | >99                          |
| 3     | 6        | 0.405                  | >99                          |
| 4     | 8        | 0.523                  | >99                          |
| 5     | 10       | 0.583                  | >99                          |

<sup>a</sup> Catalyst: Glycidyl isopropyl ether: 5 mL, **Co-NPCIH**: 1 mol%; CO<sub>2</sub> pressure: 0.1 MPa; temperature: 100 °C.

<sup>b</sup> Yields and selectivities were determined by <sup>1</sup>H NMR spectrum of the reaction mixture.

**Table S10.** Effects of the reaction time on cycloaddition of CO<sub>2</sub> and glycidyl isopropyl ether at atmospheric pressure by **Co-NPCIH** at 383 K<sup>a</sup>.

| entry | time (h) | yield (%) <sup>b</sup> | selectivity (%) <sup>b</sup> |
|-------|----------|------------------------|------------------------------|
| 1     | 2        | 0.104                  | >99                          |
| 2     | 4        | 0.295                  | >99                          |
| 3     | 6        | 0.487                  | >99                          |
| 4     | 8        | 0.591                  | >99                          |
| 5     | 10       | 0.68                   | >99                          |

<sup>a</sup> Catalyst: Glycidyl isopropyl ether: 5 mL, **Co-NPCIH**: 1 mol%; CO<sub>2</sub> pressure: 0.1 MPa; temperature: 110 °C.

<sup>b</sup> Yields and selectivities were determined by <sup>1</sup>H NMR spectrum of the reaction mixture.

**Table S11.** Effects of the reaction time on cycloaddition of CO<sub>2</sub> and glycidyl isopropyl ether at atmospheric pressure by Co-NPCIH at 393 K<sup>a</sup>.

| entry | time (h) | yield (%) <sup>b</sup> | selectivity (%) <sup>b</sup> |
|-------|----------|------------------------|------------------------------|
| 1     | 2        | 0.125                  | >99                          |
| 2     | 4        | 0.33                   | >99                          |
| 3     | 6        | 0.51                   | >99                          |
| 4     | 8        | 0.64                   | >99                          |
| 5     | 10       | 0.73                   | >99                          |

<sup>a</sup> Catalyst: Glycidyl isopropyl ether: 5 mL, Co-NPCIH: 1 mol%; CO<sub>2</sub> pressure: 0.1 MPa; temperature: 120 °C.

<sup>b</sup> Yields and selectivities were determined by <sup>1</sup>H NMR spectrum of the reaction mixture.

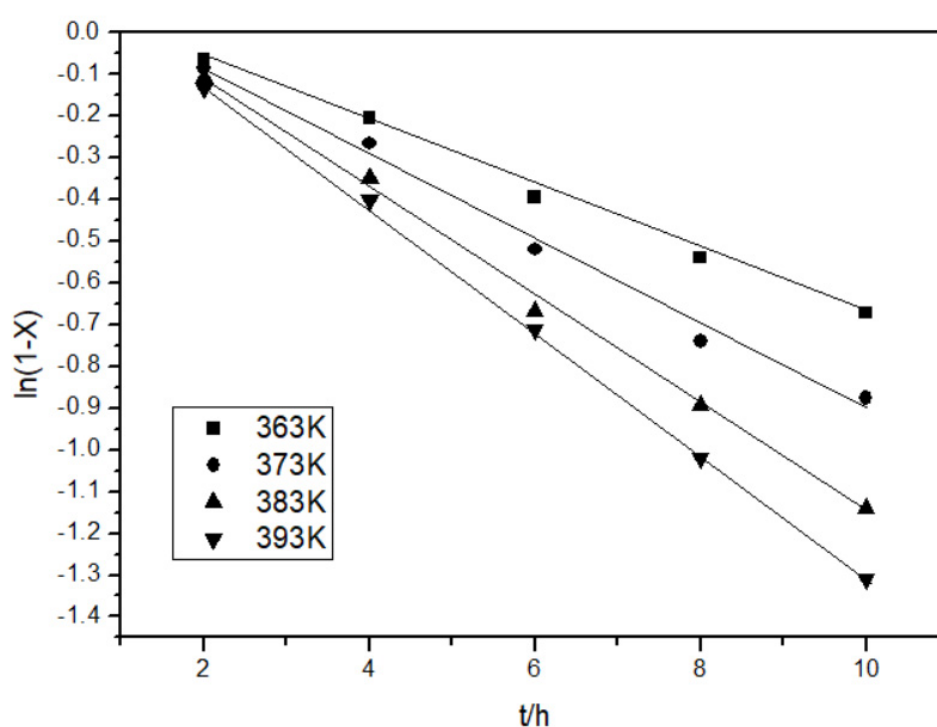**Figure S8.** Logarithmic plots of (1 – x) versus time by Co-NPCIH at 363–393 K.**Table S12.** Effects of the reaction time on cycloaddition of CO<sub>2</sub> and glycidyl isopropyl ether at atmospheric pressure by Ni-NPCIH at 363 K<sup>a</sup>.

| entry. | time (h) | yield (%) <sup>b</sup> | selectivity (%) <sup>b</sup> |
|--------|----------|------------------------|------------------------------|
| 1      | 2        | 0.02                   | >99                          |
| 2      | 4        | 0.03                   | >99                          |
| 3      | 6        | 0.06                   | >99                          |
| 4      | 8        | 0.08                   | >99                          |
| 5      | 10       | 0.12                   | >99                          |

<sup>a</sup> Catalyst: Glycidyl isopropyl ether: 5 mL, Ni-NPCIH: 1 mol%; CO<sub>2</sub> pressure: 0.1 MPa; temperature: 90 °C.

<sup>b</sup> Yields and selectivities were determined by <sup>1</sup>H NMR spectrum of the reaction mixture.

**Table S13.** Effects of the reaction time on cycloaddition of CO<sub>2</sub> and glycidyl isopropyl ether at atmospheric pressure by Ni-NPCIH at 373 K<sup>a</sup>.

| entry | time (h) | yield (%) <sup>b</sup> | selectivity (%) <sup>b</sup> |
|-------|----------|------------------------|------------------------------|
| 1     | 2        | 0.01                   | >99                          |
| 2     | 4        | 0.05                   | >99                          |
| 3     | 6        | 0.08                   | >99                          |
| 4     | 8        | 0.14                   | >99                          |
| 5     | 10       | 0.18                   | >99                          |

<sup>a</sup> Catalyst: Glycidyl isopropyl ether: 5 mL, Ni-NPCIH: 1 mol%; CO<sub>2</sub> pressure: 0.1 MPa; temperature: 100 °C.

<sup>b</sup> Yields and selectivities were determined by <sup>1</sup>H NMR spectrum of the reaction mixture.

**Table S14.** Effects of the reaction time on cycloaddition of CO<sub>2</sub> and glycidyl isopropyl ether at atmospheric pressure by Ni-NPCIH at 383 K<sup>a</sup>.

| entry | time (h) | yield (%) <sup>b</sup> | selectivity (%) <sup>b</sup> |
|-------|----------|------------------------|------------------------------|
| 1     | 2        | 0.01                   | >99                          |
| 2     | 4        | 0.06                   | >99                          |
| 3     | 6        | 0.1                    | >99                          |
| 4     | 8        | 0.15                   | >99                          |
| 5     | 10       | 0.21                   | >99                          |

<sup>a</sup> Catalyst: Glycidyl isopropyl ether: 5 mL, Ni-NPCIH: 1 mol%; CO<sub>2</sub> pressure: 0.1 MPa; temperature: 110 °C.

<sup>b</sup> Yields and selectivities were determined by <sup>1</sup>H NMR spectrum of the reaction mixture.

**Table S15.** Effects of the reaction time on cycloaddition of CO<sub>2</sub> and glycidyl isopropyl ether at atmospheric pressure by Ni-NPCIH at 393 K<sup>a</sup>.

| entry | time (h) | yield (%) <sup>b</sup> | selectivity (%) <sup>b</sup> |
|-------|----------|------------------------|------------------------------|
| 1     | 2        | 0.03                   | >99                          |
| 2     | 4        | 0.06                   | >99                          |
| 3     | 6        | 0.11                   | >99                          |
| 4     | 8        | 0.17                   | >99                          |
| 5     | 10       | 0.26                   | >99                          |

<sup>a</sup> Catalyst: Glycidyl isopropyl ether: 5 mL, Ni-NPCIH: 1 mol%; CO<sub>2</sub> pressure: 0.1 MPa; temperature: 120 °C.

<sup>b</sup> Yields and selectivities were determined by <sup>1</sup>H NMR spectrum of the reaction mixture.

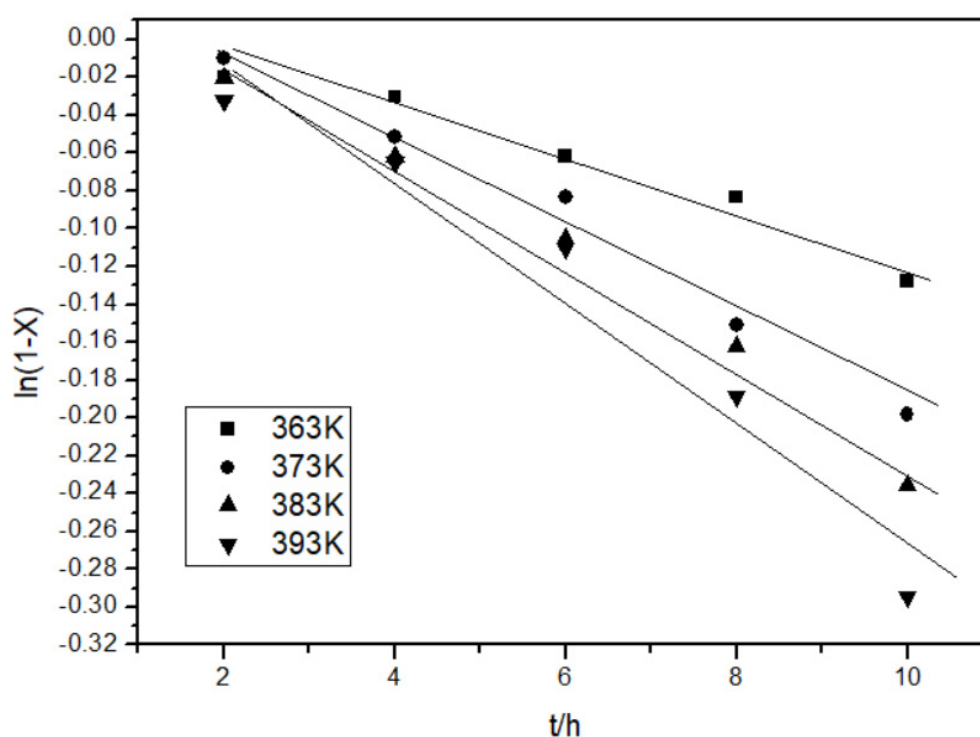**Figure S9.** Logarithmic plots of (1 – x) versus time by Ni-NPCIH at 363–393 K.
